# Supplementary material for: Cyclohexanone and 3-aminopropyltrimethoxysilane mediated controlled synthesis of mixed nickel-iron hexacyanoferrate nanosol for selective sensing of glutathione and hydrogen peroxide
Source: Royal Society of Chemistry journal article supplement (doi:10.1039/c2an36228g), 2012-12-17
Supplement: c2an36228g.pdf [file c2an36228g.pdf]

## Supporting information

### Cyclohexanone and 3-aminopropyltrimethoxysilane mediated controlled synthesis of mixed Nickel-Iron hexacyanoferrate nanosol for selective sensing of Glutathione and Hydrogen peroxide

Prem Chandra Pandey\* Ashish Kumar Pandey  
Department of Applied Chemistry,  
Indian Institute of Technology, BHU, Varanasi-221005, India  
Fax: +91 542 2368428, Tel: +91 9415813018  
E-mail: [pcpandey.apc@itbhu.ac.in](mailto:pcpandey.apc@itbhu.ac.in)

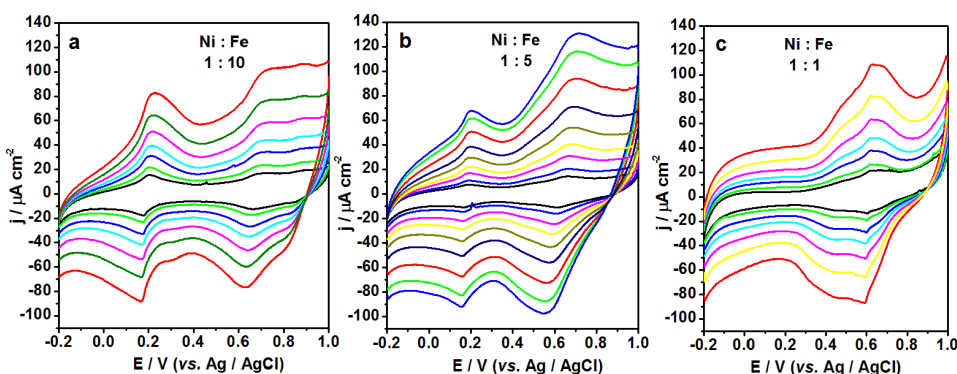

**Fig.S1.** Cyclic voltammograms of (a) Ni-Fehcf (1:10), (b) Ni-Fehcf (1:5), (c) Ni-Fehcf (1:1) modified carbon paste electrodes in 0.1 M KNO<sub>3</sub> at the scan rates of 0.01, 0.015, 0.025, 0.035, 0.050, 0.07 and 0.1 Vs<sup>-1</sup>.

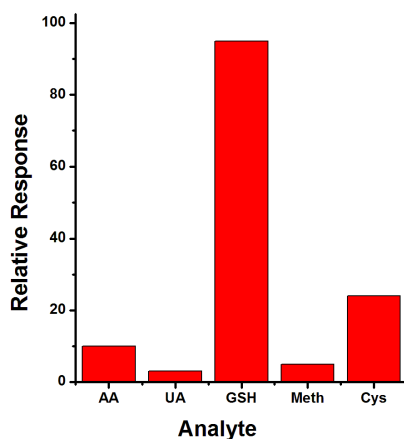

**Fig.S2.** Bar diagram depicting selectivity of GSH in presence of different analytes like ascorbic acid (AA), uric acid (UA), methionine (Meth), and L-cysteine (Cys)
